# Supplementary material for: Evaluation of a Mobile Phone–Based Intervention to Increase Parents’ Knowledge About the Measles-Mumps-Rubella Vaccination and Their Psychological Empowerment: Mixed-Method Approach
Source: PubMed Central journal article supplement (PMC5863009; doi:10.2196/mhealth.8263), 2018-03-07
Supplement: mhealth_v6i3e59_app1.pdf [file mhealth_v6i3e59_app1.pdf]

## Appendix 1. Interview grid

|                                                  |                                                                                                                                                                                                                                                                                                                                                                       |
|--------------------------------------------------|-----------------------------------------------------------------------------------------------------------------------------------------------------------------------------------------------------------------------------------------------------------------------------------------------------------------------------------------------------------------------|
| General impressions                              | What do you think of MorbiQuiz? What was your experience with this app?<br>Is there anything about MorbiQuiz that you liked particularly?<br>Anything that you did not like? Anything that annoyed you?                                                                                                                                                               |
| Perceived effects                                | What has changed in you after using MorbiQuiz? What was the effect of MorbiQuiz on you, if any?<br>To what extent has MorbiQuiz helped you make an MMR vaccination decision for your child?<br>What effects can MorbiQuiz have on other parents?<br>Why should parents download and use MorbiQuiz?                                                                    |
| Quiz and gamification                            | To what extent has the quiz helped you improve your knowledge about the MMR vaccination?<br>What do you need to feel more knowledgeable?<br>How did you perceive the leaderboard?                                                                                                                                                                                     |
| Videos, messages and interpersonal communication | What feelings did you have after watching the video? Which thoughts came to your mind after watching the video? How did you feel about receiving Sofia's messages?<br>In your opinion, what is the take-home message of the video?<br>To what extent videos and messages helped you feel more empowered in your decision?<br>What do you need to feel more empowered? |
| Suggestions                                      | How would you improve MorbiQuiz?<br>Which features would you add/remove?<br>How would you see MorbiQuiz in the future?                                                                                                                                                                                                                                                |
